# Supplementary material
Source: HighWire-hosted journal article supplement (https://diabetes.diabetesjournals.org/content/suppl/2005/06/28/54.7.1926)
Supplement: pg1926OnlineAppendix.pdf [file pg1926OnlineAppendix.pdf]

Supplemental Figure 1

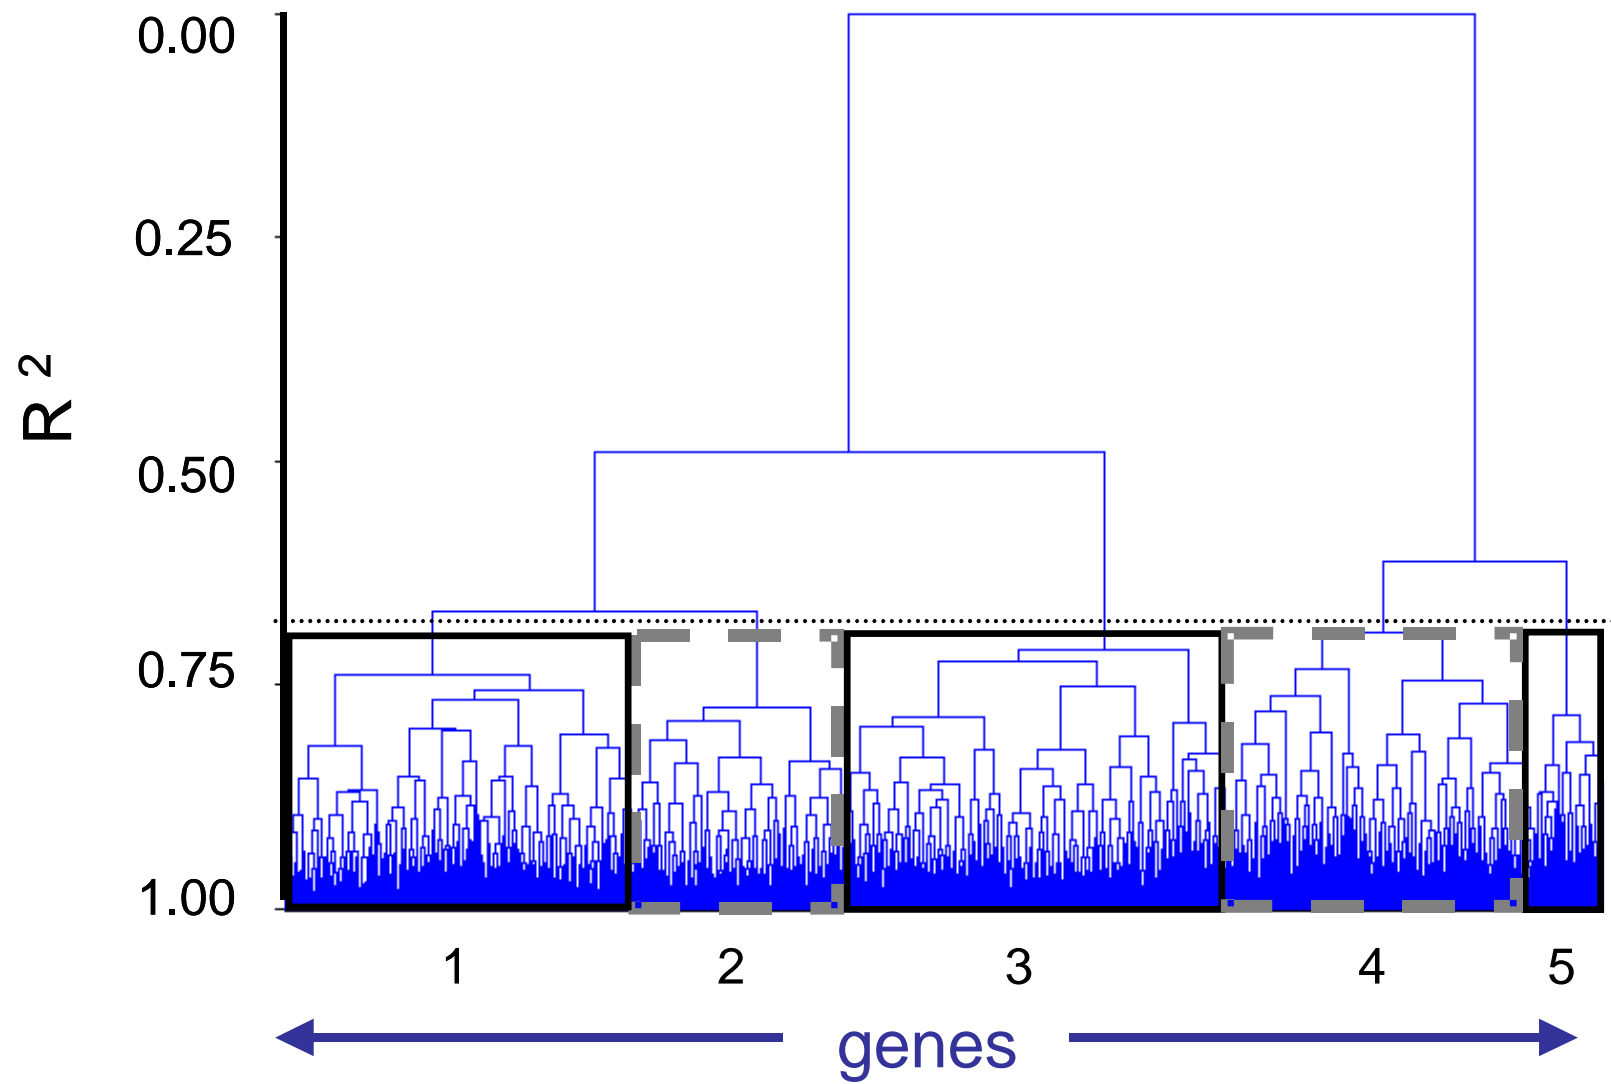

Supplemental Table 1. Oligonucleotide sequences for primer/probe sets used for qRT-PCR.

| Gene            | Accession number | Forward primer               | Probe                              | Reverse primer                  |
|-----------------|------------------|------------------------------|------------------------------------|---------------------------------|
| NDUFB3          | NM_002491        | TCAGATTGCTGTCAGACATGG        | Sybr Green detection               | TGGTGTCCCTTCTATCTTCCA           |
| NDUFB5          | NM_002492        | TTCGACACAGTGGAGACCAT         | Sybr Green detection               | TTCAGCTTGACCAATGAATACA          |
| NDUFV1          | NM_007103        | CTGATCCCCAAGTCTGTGTGTGAGA    | Sybr Green detection               | GATGTCCGTCGAGCGGTCCAT           |
| NDUFS1          | NM_005006        | GAATGTGATCTGCAGGACCAGTC      | Sybr Green detection               | GTCTTTACCAATGGCCCAATGT          |
| SDHB            | NM_003000        | AAATGTGGCCCCATGGTATTG        | Sybr Green detection               | AGAGCCACAGATGCCTTCTCTG          |
| SLC25A12        | NM_003705        | AGCACTCTAGCTGGCACAAGGAA      | Sybr Green detection               | AGTCAAGCGCCCTGAAGCATTATAT       |
| 18S             | NM_000979        | GATATGCTCATGTGGTGTGTA        | Sybr Green detection               | ACGTTCCACCTCATCTCA              |
| CYC1            | NM_001916        | TGGCCCCCTCCATCTACAC          | AGAGTTTGACGATGGCACCCAGCTA          | ATCCTTGGCTATCTGGGACATG          |
| SURF1           | NM_003172        | CCTATGTGGTCACTCCCTTCCA       | TGGTGACTCCCAGGTCGGTGCA             | TGGGAACGAACCCTCTATTTACC         |
| PGC1 $\alpha$   | NM_015062        | AGGTGAAAGTGAATACTGTTGGTTGA   | TGCTGAAGAGGGAAAGTGAGCGATTAGTTGA    | CATGTAGAATTGGCAGGTGGAA          |
| PGC1 $\beta$    | NM_133263        | CAGCCACTCGAAGGAACTTCA        | CTGAACACGGCCCTCTGCTCTACA           | CGGATGCTTGGCGTTCTG              |
| mtTFA           | NM_009360        | CCCAGATGCAAAAACACTACAGAACTAA | CGCAGTCACAACACTTACAAGCCAAAC        | TCCGCCCTATAAGCATCTTGA           |
| NRF1            | NM_005011        | CGTTGCCCAAGTGAATTATTCTG      | TTGTTCCACCTCTCCATCAGCCA            | CCCTGTAACGTGGCCCAAT             |
| RPLP0           | NM_001002        | CCATTCTATCATCAACGGGTACAA     | TCTCCACAGACAAGGCCAGGACTCG          | AGCAAGTGGGAAGGTGTAATCC          |
| mmNDUFB3        | NM_025597        | TGGCCATGGTAAAATGGAAC         | CAGATTACAGACAGTGGAAAATTGAAGGGACG   | AAGCTTCTTCTGCACCGTTTCT          |
| mmNDUFB5        | NM_025316        | GCATCCGATATCAAGATGGATCG      | CTGAAAAGAAGTACGAGAAAACCCTGGCTATCCT | CTTTAACCCTAAGTACGCTTTTCA        |
| mmSLC25A12      | NM_172436        | CACCACAGGACCGAGAGTCA         | TGCTTCAGGACCTGGGACTTTTCCG          | GGCTTTGGCACCCCTGTACA            |
| mmSDHB          | NM_023374        | CCCAGGAGGGCAAGCAA            | AGTATCTGCAGTCCATCGAGGACCGG         | GTACAGCCCCTCCAGCTTCT            |
| mmCYC1          | NM_025567        | CAGCTACCCATGGTCTCATCGT       | TCCGAATGCTGGTGTGGTCCAAGGA          | CACCTGCTTGTATACCTGGAAACC        |
| mmSURF1         | NM_013677        | AAGTGAATCCTGAGACCAGACAGA     | AGGCCAGGTTCTGGGAGAAGTAGACC         | TGTGAGCCTCACTATGCCAAT           |
| mmPGC1 $\alpha$ | NM_008904        | CATTTGATGCACTGACAGATGGA      | CCGTGACCACTGACAACGAGGCC            | CCGTGAGGCATGGAGGAA              |
| mmPGC1 $\beta$  | NM_133249        | AGGAAGCGGGCGGAAA             | AGAGATTTTCAATGTATACCACACGGCCTTCA   | CTACAATCTCACCGAACCTCAA          |
| mmCOXII         | NC_005089        | TTTTCAGGCTTACCCTAGATGA       | CATGAGCAAAAAGCCACTTCGCCA           | GAAGAATGTTATGTTTACTCCTACGAATATG |
| mmUCP2          | NM_011671        | GCGTTCTGGGTACCATCCTAAC       | CGCACTGAGGGTCCACGCAGC              | GCGACCAGCCCATTGTAGA             |
| mmCycB          | NM_011149        | GGTGGAGAGCACCAAGACAGA        | ATCCTTCAGTGGCTGTCCCGCT             | GCCGGAGTCGACAATGATG             |

NDUFB3 NADH dehydrogenase (ubiquinone) 1 beta subcomplex, 3; NDUFB5 NADH dehydrogenase (ubiquinone) 1 beta subcomplex, 5; NDUFV1 NADH dehydrogenase (ubiquinone) flavoprotein 1; NDUFS1 NADH dehydrogenase (ubiquinone) Fe-S protein 1; SDHB succinate dehydrogenase complex, subunit B; SLC25A12 solute carrier family 25 (mitochondrial carrier); 18S 18S ribosomal RNA; CYC1 cytochrome c-1; SURF1 surfait 1; PGC1 $\alpha$  peroxisome proliferative activated receptor, gamma, coactivator 1, alpha; PGC1 $\beta$  peroxisome proliferative activated receptor, gamma, coactivator 1, beta; mtTFA transcription factor A, mitochondrial; NRF1 nuclear respiratory factor-1; RPLP0 ribosomal protein, large, P0; mm mus musculus; mmNDUFB3 NADH dehydrogenase (ubiquinone) 1 beta subcomplex, 3; mmNDUFB5 NADH dehydrogenase (ubiquinone) 1 beta subcomplex, 5; mmSLC25A12 solute carrier family 25 (mitochondrial carrier); mmSDHB succinate dehydrogenase complex, subunit B; mmCYC1 cytochrome c-1; mmSURF1 surfait 1; mmPGC1 $\alpha$  peroxisome proliferative activated receptor, gamma, coactivator 1, alpha; mmPGC1 $\beta$  peroxisome proliferative activated receptor, gamma, coactivator 1, beta; mmCOXII cytochrome c oxidase II, mitochondrial; mmUCP2 uncoupling protein 2; mmCycB peptidylprolyl isomerase B (cyclophilin B). For all assays performed using SYBR Green I detection, 18S was used.

Supplemental Table 2. Microarray 'Hit' List

| CLUSTER | ACCESSION | GENE DESCRIPTION                                                                                                          | FOLD CHANGE | DIRECTION | FUNCTION                                    | BONFERRONI P |
|---------|-----------|---------------------------------------------------------------------------------------------------------------------------|-------------|-----------|---------------------------------------------|--------------|
| 1       | NM_016699 | Human sperm-specific protein (LOC51170), mRNA                                                                             | 2.1         | down      | biological process unknown                  | 0.00009      |
| 1       | AK002789  | Homo sapiens cDNA FL20872 fs, clone COLC3841                                                                              | 2.5         | down      | biological process unknown                  | 1.4217E-09   |
| 1       | AK01462   | Homo sapiens cDNA FL11400 fs, clone HEMBA100673                                                                           | 2.4         | down      | biological process unknown                  | 1.3797E-05   |
| 1       | AL117663  | Homo sapiens mRNA, cDNA DKF Zp586C0224 (from clone DKF Zp586C0224)                                                        | 2.2         | down      | biological process unknown                  | 0.00005843   |
| 1       | AL131897  | Homo sapiens mRNA, cDNA DKF Zp43462411 (from clone DKF Zp43462411)                                                        | 2.2         | down      | biological process unknown                  | 0.00170987   |
| 1       | AK002032  | Homo sapiens cDNA FL20825 fs, clone AKC611649                                                                             | 1.8         | down      | biological process unknown                  | 0.00025246   |
| 1       | L19362    | Human (clone xp.1) mRNA sequence                                                                                          | 1.8         | down      | biological process unknown                  | 0.00044252   |
| 1       | AK022297  | Homo sapiens cDNA FL12235 fs, clone MAMMA1001243                                                                          | 1.7         | down      | biological process unknown                  | 0.00513922   |
| 1       | NM_016417 | Homo sapiens clone FL184739 (LOC512718), mRNA                                                                             | 1.5         | down      | biological process unknown                  | 0.00147364   |
| 1       | AF106156  | Homo sapiens full length insert cDNA clone ZB98142                                                                        | 1.5         | down      | biological process unknown                  | 0.00237467   |
| 1       | AF109102  | Homo sapiens clone IMAGE_21785                                                                                            | 2.1         | down      | biological process unknown                  | 0.00281166   |
| 1       | AB029946  | Homo sapiens mRNA for KIAA1045 protein, partial cds                                                                       | 1.5         | down      | biological process unknown                  | 0.00099956   |
| 1       | AL117363  | Homo sapiens mRNA, cDNA DKF Zp43401026 (from clone DKF Zp43401026)                                                        | 1.4         | down      | biological process unknown                  | 0.00266574   |
| 1       | AK028037  | Homo sapiens cDNA FL20236 fs, clone HRC02954                                                                              | 1.4         | down      | biological process unknown                  | 0.00099269   |
| 1       | X17638    | H sapiens SRI mRNA                                                                                                        | 1.6         | down      | biological process unknown                  | 0.00688159   |
| 1       | AF086350  | Homo sapiens full length insert cDNA clone ZKAC608                                                                        | 2.2         | down      | biological process unknown                  | 0.00801914   |
| 1       | AL151476  | Homo sapiens mRNA, cDNA DKF Zp761C082 (from clone DKF Zp761C082)                                                          | 1.7         | down      | cell adhesion                               | 0.00809978   |
| 1       | NM_001491 | Homo sapiens mRNA for KIAA1176 protein, partial cds                                                                       | 1.4         | down      | complex (NEMO to ubiquitin)                 | 0.00127587   |
| 1       | D87292    | Homo sapiens mRNA for rhodanese, complete cds                                                                             | 1.9         | down      | cytosolic catabolism                        | 0.00610911   |
| 1       | AB037743  | Homo sapiens mRNA for KIAA1322 protein, partial cds                                                                       | 1.4         | down      | developmental processes                     | 0.00100286   |
| 1       | AF052087  | Homo sapiens clone Z8604 mRNA sequence                                                                                    | 1.1         | down      | DNA packaging                               | 3.34674E-06  |
| 1       | AB040490  | Homo sapiens mRNA for KIAA1176 protein, partial cds                                                                       | 1.4         | down      | plasma metabolism                           | 0.00039728   |
| 1       | NM_005532 | Homo sapiens propionyl Coenzyme A carboxylase, beta polypeptide (PCCB), nuclear gene encoding mitochondrial protein, mRNA | 1.6         | down      | fatty acid catabolism                       | 2.98029E-06  |
| 1       | NM_000155 | Homo sapiens galactose-1-phosphate uridylyltransferase (GALT), mRNA                                                       | 1.6         | down      | galactose metabolism                        | 0.00064843   |
| 1       | NM_007126 | Homo sapiens vesicle-containing protein (VCP), mRNA                                                                       | 2           | down      | intracellular protein traffic               | 0.00041326   |
| 1       | NM_016556 | Homo sapiens DKF ZP564Z21 protein (DKF ZP564Z21), mRNA                                                                    | 1.7         | down      | intracellular processing                    | 1.14425E-07  |
| 1       | NM_002487 | Homo sapiens nuclear (mouse) homolog (NDN), mRNA                                                                          | 1.2         | down      | neurogenesis                                | 0.00723221   |
| 1       | NM_000476 | Homo sapiens adenylate kinase 1 (AK1), nuclear gene encoding mitochondrial protein, mRNA                                  | 1.5         | down      | nucleic acid metabolism                     | 0.00090824   |
| 1       | AB039603  | Homo sapiens sp.1 mRNA for interferon responsive finger protein 1 long form, complete cds                                 | 2           | down      | pathogenesis                                | 0.00120886   |
| 1       | NM_016112 | Homo sapiens calyculin: tetrahydroimidazo[4,5-b]pyridin-2(1H)-one                                                         | 2           | down      | protein synthesis inhibition                | 0.00149464   |
| 1       | NM_000566 | Homo sapiens embryonic LUCY11, mRNA                                                                                       | 1.6         | down      | proliferation and peptidolysis              | 0.00039832   |
| 1       | NM_004236 | Homo sapiens thyroid receptor interacting protein 15 (TRIP15), mRNA                                                       | 1.9         | down      | signal transduction                         | 0.00606494   |
| 1       | NM_003974 | Homo sapiens docking protein 2, SHAD (DOK2), mRNA                                                                         | 1.4         | down      | signal transduction (cell surface receptor) | 0.005136911  |
| 1       | AF160189  | Homo sapiens AST1 protein mRNA, partial cds                                                                               | 1.6         | down      | transcription regulation                    | 0.00143671   |
| 1       | NM_001291 | Homo sapiens cyclic nucleotide-gated channel beta 1 (CNGB1), mRNA, and translated products                                | 1.7         | down      | vision                                      | 2.0146E-09   |
| 1       | L23867    | Homo sapiens mRNA fragment                                                                                                | 1.8         | up        | biological process unknown                  | 9.4574E-08   |
| 1       | L23869    | Homo sapiens mRNA fragment                                                                                                | 1.8         | up        | biological process unknown                  | 9.4574E-08   |
| 1       | L23870    | Homo sapiens mRNA fragment                                                                                                | 1.8         | up        | biological process unknown                  | 9.4574E-08   |
| 1       | L43148    | Homo sapiens mRNA fragment                                                                                                | 1.8         | up        | biological process unknown                  | 9.4574E-08   |
| 1       | L43147    | Homo sapiens mRNA fragment                                                                                                | 1.8         | up        | biological process unknown                  | 9.4574E-08   |
| 1       | L43149    | Homo sapiens mRNA fragment                                                                                                | 1.8         | up        | biological process unknown                  | 9.4574E-08   |
| 1       | L43150    | Homo sapiens mRNA fragment                                                                                                | 1.8         | up        | biological process unknown                  | 9.4574E-08   |
| 1       | AL149411  | Homo sapiens mRNA, cDNA DKF Zp586B012 (from clone DKF Zp586B012)                                                          | 1.7         | down      | biological process unknown                  | 2.22656E-06  |
| 1       | NM_018593 | Homo sapiens hypothetical protein PRO0811 (PRO0811), mRNA                                                                 | 1.7         | up        | biological process unknown                  | 0.000337473  |
| 1       | X04236    | Human small cellular 7.5K mRNA                                                                                            | 1.2         | up        | biological process unknown                  | 0.00113783   |
| 1       | L09070    | Homo sapiens mRNA fragment                                                                                                | 1.8         | up        | blood coagulation                           | 9.4574E-08   |
| 1       | L09071    | Homo sapiens mRNA fragment                                                                                                | 1.8         | up        | blood coagulation                           | 9.4574E-08   |
| 1       | L09080    | Homo sapiens mRNA fragment                                                                                                | 1.8         | up        | blood coagulation                           | 9.4574E-08   |
| 1       | L09081    | Homo sapiens mRNA fragment                                                                                                | 1.8         | up        | blood coagulation                           | 9.4574E-08   |
| 1       | L09100    | Homo sapiens mRNA fragment                                                                                                | 1.8         | up        | blood coagulation                           | 9.4574E-08   |
| 1       | L09162    | Homo sapiens mRNA fragment                                                                                                | 1.8         | up        | blood coagulation                           | 9.4574E-08   |
| 1       | L10146    | Homo sapiens mRNA fragment                                                                                                | 1.8         | up        | blood coagulation                           | 9.4574E-08   |
| 1       | Z36789    | H sapiens (x138) mRNA, 250bp                                                                                              | 1.9         | up        | blood coagulation                           | 2.33058E-06  |
| 1       | NM_005655 | Homo sapiens TGF $\beta$ inducible early growth response (TIEG), mRNA                                                     | 1.9         | up        | cell proliferation                          | 1.3307E-09   |
| 1       | NM_016480 | Homo sapiens hypothetical protein (HSPC228), mRNA                                                                         | 1.6         | up        | cell wall integrity                         | 0.160729E-09 |
| 1       | L09056    | Homo sapiens mRNA fragment                                                                                                | 1.8         | up        | chymotrypsin                                | 9.4574E-08   |
| 1       | L09092    | Homo sapiens mRNA fragment                                                                                                | 1.8         | up        | chymotrypsin                                | 9.4574E-08   |
| 1       | L09095    | Homo sapiens mRNA fragment                                                                                                | 1.8         | up        | chymotrypsin                                | 9.4574E-08   |
| 1       | L09099    | Homo sapiens mRNA fragment                                                                                                | 1.8         | up        | chymotrypsin                                | 9.4574E-08   |
| 1       | L10140    | Homo sapiens mRNA fragment                                                                                                | 1.8         | up        | chymotrypsin                                | 9.4574E-08   |
| 1       | L10141    | Homo sapiens mRNA fragment                                                                                                | 1.8         | up        | chymotrypsin                                | 9.4574E-08   |
| 1       | L10147    | Homo sapiens mRNA fragment                                                                                                | 1.8         | up        | chymotrypsin                                | 9.4574E-08   |
| 1       | L10148    | Homo sapiens mRNA fragment                                                                                                | 1.8         | up        | chymotrypsin                                | 9.4574E-08   |
| 1       | L10151    | Homo sapiens mRNA fragment                                                                                                | 1.8         | up        | chymotrypsin                                | 9.4574E-08   |
| 1       | L09802    | Homo sapiens mRNA fragment                                                                                                | 1.8         | up        | humoral defense mechanism                   | 9.4574E-08   |
| 1       | L09878    | Homo sapiens mRNA fragment                                                                                                | 1.8         | up        | humoral defense mechanism                   | 9.4574E-08   |
| 1       | L09899    | Homo sapiens mRNA fragment                                                                                                | 1.8         | up        | humoral defense mechanism                   | 9.4574E-08   |
| 1       | L09698    | Homo sapiens mRNA fragment                                                                                                | 1.8         | up        | humoral defense mechanism                   | 9.4574E-08   |
| 1       | NM_003238 | Homo sapiens transferrin receptor (p90, CD71) (TFRC), mRNA                                                                | 1.5         | up        | iron transport                              | 0.009        |
| 1       | NM_001492 | Homo sapiens growth differentiation factor 1 (GDF1), mRNA                                                                 | 1.4         | up        | membrane targeting                          | 3.26237E-07  |
| 1       | NM_009584 | Homo sapiens prostaglandin D2 synthase (PTG2, trany) (PTGDS), mRNA                                                        | 1.9         | up        | prostaglandin metabolism                    | 4.78947E-06  |
| 1       | NM_011049 | Homo sapiens hypothetical protein L20084 (FLJ20084), mRNA                                                                 | 1.3         | up        | protein modification                        | 0.00088306   |
| 1       | NM_000067 | Homo sapiens carbonic anhydrase IV (CA4), mRNA                                                                            | 1           | up        | protein targeting                           | 0.00292499   |
| 1       | L09067    | Homo sapiens mRNA fragment                                                                                                | 1.8         | up        | proteolysis and peptidolysis                | 9.4574E-08   |
| 1       | NM_007163 | Homo sapiens epidermal growth factor (beta-uregulin) (EGF), mRNA                                                          | 1.7         | up        | signal transduction                         | 0.00176954   |
| 1       | L01148    | Human interleukin-1 receptor soluble form mRNA, complete cds                                                              | 1.2         | up        | signal transduction (cell surface receptor) | 0.00100714   |
| 2       | AF124745  | Homo sapiens full length insert cDNA clone YP99107                                                                        | 1.2         | up        | biological process unknown                  | 3.35948E-09  |
| 2       | AF070565  | Homo sapiens clone 24425 mRNA sequence                                                                                    | 2           | down      | biological process unknown                  | 2.38024E-08  |
| 2       | AL149461  | Homo sapiens mRNA, cDNA DKF Zp566B143 (from clone DKF Zp566B143)                                                          | 1.6         | down      | biological process unknown                  | 2.13073E-05  |
| 2       | AL296569  | Homo sapiens mRNA, cDNA DKF Zp43106B4 (from clone DKF Zp43106B4)                                                          | 1.8         | down      | biological process unknown                  | 0.00009111   |
| 2       | AL052448  | Homo sapiens mRNA, cDNA DKF Zp586C1523 (from clone DKF Zp586C1523)                                                        | 2           | down      | biological process unknown                  | 9.52366E-05  |
| 2       | AF086254  | Homo sapiens full length insert cDNA clone ZD43410                                                                        | 1.1         | down      | biological process unknown                  | 0.000105155  |
| 2       | AK007956  | Homo sapiens cDNA FL11044 fs, clone PLACE1004451                                                                          | 1.4         | down      | biological process unknown                  | 0.00256093   |
| 2       | NM_000083 | Homo sapiens chloride channel 1, skeletal muscle (CLCN1), mRNA                                                            | 1.6         | down      | chloride transport                          | 2.59873E-07  |
| 2       | NM_001826 | Homo sapiens chloride channel 1 (CLCN1), mRNA                                                                             | 1.6         | down      | chloride transport                          | 0.00176818   |
| 2       | NM_017781 | Homo sapiens DKF ZP564K247 protein (DKF ZP564K247), mRNA                                                                  | 1.4         | down      | electron transport                          | 0.00243284   |
| 2       | NM_004170 | mRNA                                                                                                                      | 1.3         | down      | glutamate transport                         | 0.000786263  |
| 2       | NM_016467 | Homo sapiens uncharacterized hematopoietic stem/progenitor cells protein MD0502 (MD0502), mRNA                            | 1.8         | down      | immune response                             | 0.00086921   |
| 2       | NM_000466 | Homo sapiens feline collagen fibrinogen domain-containing 3 (Fkappa antigen) (FCN3), mRNA                                 | 1.6         | down      | chymotrypsin                                | 0.00092942   |
| 2       | NM_000717 | Homo sapiens carbonic anhydrase IV (CA4), mRNA                                                                            | 1.5         | down      | protein targeting                           | 0.0041672    |
| 2       | NM_001344 | Homo sapiens ubiquitin-conjugating enzyme E2H (homologous to yeast UbcH2) (UBE2H), mRNA                                   | 1.4         | down      | proteolysis and peptidolysis                | 0.66848E-06  |
| 2       | AK026637  | Homo sapiens cDNA FL22004 fs, clone HE196671                                                                              | 2.1         | down      | sensory perception                          | 3.78602E-08  |
| 2       | NM_016159 | Homo sapiens KIAA0174 gene product (KIAA0174), mRNA                                                                       | 1.2         | down      | chemotaxis                                  | 0.00081115   |
| 2       | NM_014752 | Homo sapiens KIAA0102 gene product (KIAA0102), mRNA                                                                       | 1.2         | down      | steroid metabolism                          | 0.00054074   |
| 2       | NM_003167 | Homo sapiens sulfotransferase family 2A, dehydroepiandrosterone (DHEA)-preferring, member 1 (SULT2A1), mRNA               | 1.3         | down      | steroid metabolism                          | 0.00846903   |
| 2       | NM_014845 | Homo sapiens KIAA0274 gene product (KIAA0274), mRNA                                                                       | 1.6         | down      | synaptic vesicle endocytosis                | 4.30696E-09  |
| 2       | AF055830  | Homo sapiens clone 24523 mRNA sequence                                                                                    | 1.5         | down      | transcription regulation                    | 0.00140267   |
| 2       | NM_007016 | Homo sapiens protein similar to E. coli ynfj and R. capsulatus HNR3 (PP3B), mRNA                                          | 1.4         | down      | de novo pyrimidine biosynthesis             | 0.00204968   |
| 2       | NM_000375 | Homo sapiens voltage-dependent anion channel 2 (VMAC2), nuclear gene encoding mitochondrial protein, mRNA                 | 1.5         | down      | anion transport                             | 2.2842E-06   |

|   |           |                                                                                                            |     |      |                                 |             |
|---|-----------|------------------------------------------------------------------------------------------------------------|-----|------|---------------------------------|-------------|
| 2 | M5536     | Human glucose transporter pseudogene                                                                       | 1.4 | up   | biological process unknown      | 4.688E-12   |
| 2 | AF08551   | Human SLC5C1 mRNA, partial cds                                                                             | 1.2 | up   | biological process unknown      | 7.2417E-09  |
| 2 | AL161991  | Human sapiens mRNA, cDNA DKF(Z)761C169 from clone DKF(Z)761C169, partial cds                               | 1.4 | up   | biological process unknown      | 6.2599E-08  |
| 2 | U10511    | Human clone Z012 Csi-dua1 critical region mRNA, partial sequence                                           | 1.9 | up   | biological process unknown      | 1.5762E-06  |
| 2 | L23867    | Human sapiens mRNA fragment                                                                                | 1.8 | up   | biological process unknown      | 0.001922163 |
| 2 | L23869    | Human sapiens mRNA fragment                                                                                | 1.8 | up   | biological process unknown      | 0.001922163 |
| 2 | L23870    | Human sapiens mRNA fragment                                                                                | 1.8 | up   | biological process unknown      | 0.001922163 |
| 2 | L41345    | Human sapiens mRNA fragment                                                                                | 1.8 | up   | biological process unknown      | 0.001922163 |
| 2 | L41347    | Human sapiens mRNA fragment                                                                                | 1.8 | up   | biological process unknown      | 0.001922163 |
| 2 | L41349    | Human sapiens mRNA fragment                                                                                | 1.8 | up   | biological process unknown      | 0.001922163 |
| 2 | L41350    | Human sapiens mRNA fragment                                                                                | 1.8 | up   | biological process unknown      | 0.001922163 |
| 2 | AK024927  | Human sapiens cDNA FL121274 f6, clone COL01781                                                             | 1.5 | up   | biological process unknown      | 0.001126244 |
| 2 | X14804    | H.sapiens D54 mRNA                                                                                         | 1.6 | up   | biological process unknown      | 0.00176293  |
| 2 | AK022610  | Human sapiens cDNA FL13548 f6, clone PLACE100768                                                           | 1.4 | up   | biological process unknown      | 0.00504947  |
| 2 | AK028479  | Human sapiens cDNA FL13028 f6, clone UNG01738                                                              | 2.1 | up   | biological process unknown      | 0.00837973  |
| 2 | L09070    | Human sapiens mRNA fragment                                                                                | 1.8 | up   | blood coagulation               | 0.001922163 |
| 2 | L09071    | Human sapiens mRNA fragment                                                                                | 1.8 | up   | blood coagulation               | 0.001922163 |
| 2 | L09080    | Human sapiens mRNA fragment                                                                                | 1.8 | up   | blood coagulation               | 0.001922163 |
| 2 | L09081    | Human sapiens mRNA fragment                                                                                | 1.8 | up   | blood coagulation               | 0.001922163 |
| 2 | L09100    | Human sapiens mRNA fragment                                                                                | 1.8 | up   | blood coagulation               | 0.001922163 |
| 2 | L09102    | Human sapiens mRNA fragment                                                                                | 1.8 | up   | blood coagulation               | 0.001922163 |
| 2 | L10146    | Human sapiens mRNA fragment                                                                                | 1.8 | up   | blood coagulation               | 0.001922163 |
| 2 | AK221566  | Human sapiens mRNA containing UTR1 and mRNA, 1                                                             | 1.2 | up   | cell growth and maintenance     | 5.9063E-06  |
| 2 | L25080    | Human sapiens CYP-binding protein (P4A) mRNA, complete cds                                                 | 1.4 | up   | cell growth and maintenance     | 0.00252602  |
| 2 | L09086    | Human sapiens mRNA fragment                                                                                | 1.8 | up   | chymotrypsin                    | 0.001922163 |
| 2 | L09092    | Human sapiens mRNA fragment                                                                                | 1.8 | up   | chymotrypsin                    | 0.001922163 |
| 2 | L09095    | Human sapiens mRNA fragment                                                                                | 1.8 | up   | chymotrypsin                    | 0.001922163 |
| 2 | L09099    | Human sapiens mRNA fragment                                                                                | 1.8 | up   | chymotrypsin                    | 0.001922163 |
| 2 | L10140    | Human sapiens mRNA fragment                                                                                | 1.8 | up   | chymotrypsin                    | 0.001922163 |
| 2 | L10141    | Human sapiens mRNA fragment                                                                                | 1.8 | up   | chymotrypsin                    | 0.001922163 |
| 2 | L10147    | Human sapiens mRNA fragment                                                                                | 1.8 | up   | chymotrypsin                    | 0.001922163 |
| 2 | L10148    | Human sapiens mRNA fragment                                                                                | 1.8 | up   | chymotrypsin                    | 0.001922163 |
| 2 | L10151    | Human sapiens mRNA fragment                                                                                | 1.8 | up   | chymotrypsin                    | 0.001922163 |
| 2 | AB011152  | Human sapiens mRNA for KIAA0680 protein, partial cds                                                       | 1.4 | up   | cytoskeleton integrity          | 2.58635E-05 |
| 2 | NM_020367 | Human sapiens HIRB9A (C12orf6), mRNA                                                                       | 1.1 | up   | cytoskeleton integrity          | 0.00043576  |
| 2 | AK022483  | Human sapiens cDNA FL13621 f6, clone PLACE101964                                                           | 1.1 | up   | cytoskeleton integrity          | 0.00036689  |
| 2 | AK022872  | Human sapiens cDNA FL12810 f6, clone NT28P000464, weakly similar to DNA CROSS-LINK REPAIR PROTEIN P5025NM1 | 1.6 | up   | DNA repair                      | 3.07146E-07 |
| 2 | NM_004299 | Human sapiens RecQ protein 5 (RECQ5) mRNA                                                                  | 1.4 | up   | DNA repair                      | 1.43416E-06 |
| 2 | NM_020907 | Human sapiens RecQ protein like (DNA helicase D1 like) (RECQL1) mRNA                                       | 1.5 | up   | DNA repair                      | 0.000816687 |
| 2 | NM_014183 | Human sapiens hypothetical protein FL110101 (FL110101), mRNA                                               | 1   | up   | DNA repair                      | 0.001142495 |
| 2 | M20699    | Human terminal deoxynucleotidyltransferase gene, clone 7                                                   | 1.4 | up   | DNA replication                 | 5.20375E-09 |
| 2 | NM_001714 | Human sapiens Bicaudal D (Drosophila) homolog 1 (BICD1) mRNA                                               | 1.5 | up   | embryogenesis and morphogenesis | 1.56169E-06 |
| 2 | NM_014590 | Human sapiens endonuclease/reoviral family W, member 1 (cyclyp1) (ERW1), mRNA                              | 1.2 | up   | embryogenesis and morphogenesis | 2.4067E-06  |
| 2 | X17112    | H.sapiens mRNA for glycogen kinase kinase-specific 2                                                       | 1.9 | up   | enzyme metabolism               | 0.00135017  |
| 2 | L09092    | Human sapiens mRNA fragment                                                                                | 1.8 | up   | humoral defense mechanism       | 0.001922163 |
| 2 | L09078    | Human sapiens mRNA fragment                                                                                | 1.8 | up   | humoral defense mechanism       | 0.001922163 |
| 2 | L09089    | Human sapiens mRNA fragment                                                                                | 1.8 | up   | humoral defense mechanism       | 0.001922163 |
| 2 | L09098    | Human sapiens mRNA fragment                                                                                | 1.8 | up   | humoral defense mechanism       | 0.001922163 |
| 2 | NM_020364 | Human sapiens intracytosolic zinc protein (PZFP) mRNA                                                      | 1.6 | up   | intracellular protein traffic   | 0.00591476  |
| 2 | AB031102  | Human sapiens mRNA for KIAA1276 protein, partial cds                                                       | 1.5 | up   | muscle contraction              | 2.87047E-07 |
| 2 | NM_019795 | Human sapiens neuronal cell death-inhibitor protein (LOC531614), mRNA                                      | 1.5 | up   | neuric acid metabolism          | 3.8623E-05  |
| 2 | NM_020367 | Human sapiens Sirtuin-5 methyltransferase (SIRT5) mRNA                                                     | 1.3 | up   | neuric acid metabolism          | 0.00035568  |
| 2 | NM_010360 | Human sapiens clone H00471 PRC0A17p (LOC51204), mRNA                                                       | 1.5 | up   | nucleotide excision repair      | 3.44837E-06 |
| 2 | NM_014873 | Human sapiens KIAA0205 gene product (KIAA0205), mRNA                                                       | 1.7 | up   | phosphatidic acid biosynthesis  | 0.003616239 |
| 2 | L09097    | Human sapiens mRNA fragment                                                                                | 1.8 | up   | proteolysis and peptidolysis    | 0.001922163 |
| 2 | AB010310  | Human sapiens mRNA for KIAA0761 protein, partial cds                                                       | 1.4 | up   | pyruvate metabolism             | 0.000210553 |
| 2 | NM_005513 | Human sapiens interactor, gamma inducible protein 18 (IPI18) mRNA                                          | 1.3 | up   | transcription regulation        | 6.62181E-07 |
| 2 | AJ_291181 | Human sapiens LHX3 protein mRNA, complete cds                                                              | 1.4 | up   | transcription regulation        | 0.00041144  |
| 2 | NM_006586 | Human sapiens solute carrier family 12 (potassium/chloride transporters), member 7 (SLC12A7), mRNA         | 2.8 | up   | transport                       | 0.000156665 |
| 2 | AF000637  | Human sapiens E1a CTPase A protein (E1A) A1 mRNA, partial cds                                              | 1.5 | up   | transport                       | 0.00000205  |
| 2 | X09099    | Human sapiens unknown gene, interactor of co-repressing repressor                                          | 1.4 | up   | transport                       | 8.29798E-07 |
| 3 | NM_014028 | Human sapiens HSPCD19 protein (HSPCD19), mRNA                                                              | 1.2 | down | biological process unknown      | 1.26257E-08 |
| 3 | AK022850  | Human sapiens cDNA FL112788 f6, clone NT28P0001944                                                         | 1.4 | down | biological process unknown      | 1.5382E-07  |
| 3 | AJ_131855 | Human sapiens clone 2056 mRNA sequence                                                                     | 1.5 | down | biological process unknown      | 2.8483E-07  |
| 3 | AJ_141343 | Human sapiens full length insert cDNA clone YB11808                                                        | 1.9 | down | biological process unknown      | 5.4735E-06  |
| 3 | L39924    | Human sapiens (clone HPL114E) mRNA, partial EST                                                            | 1.4 | down | biological process unknown      | 2.23848E-05 |
| 3 | AK001728  | Human sapiens cDNA FL110366 f6, clone NT28M0001420                                                         | 1.8 | down | biological process unknown      | 2.26177E-05 |
| 3 | NM_014118 | Human sapiens PRO0159 protein (PRO0159), mRNA                                                              | 1.9 | down | biological process unknown      | 4.2962E-05  |
| 3 | AF088878  | Human sapiens full length insert cDNA clone YB18405                                                        | 1.3 | down | biological process unknown      | 7.2132E-06  |
| 3 | AL109715  | Human sapiens mRNA full length insert cDNA clone EUROIMAGE 430268                                          | 1.4 | down | biological process unknown      | 0.00185708  |
| 3 | AK002150  | Human sapiens cDNA FL111288 f6, clone PLACE1009607                                                         | 1.8 | down | biological process unknown      | 0.000234275 |
| 3 | AJ_109818 | Human sapiens mRNA full length insert cDNA clone EUROIMAGE 19107                                           | 1.3 | down | biological process unknown      | 0.000427163 |
| 3 | AJ_009085 | Human sapiens clone TRC5 Csi-dua1 critical region mRNA                                                     | 1.4 | down | biological process unknown      | 0.00044526  |
| 3 | AL04342   | Human sapiens mRNA, cDNA DKF(Z)556A191 from clone DKF(Z)556A191                                            | 1.5 | down | biological process unknown      | 0.000592814 |
| 3 | NM_014157 | Human sapiens HSPC065 protein (HSPC065), mRNA                                                              | 1.4 | down | biological process unknown      | 0.00027676  |
| 3 | AK002109  | Human sapiens cDNA FL11247 f6, clone PLACE1008893                                                          | 1.4 | down | biological process unknown      | 0.001115375 |
| 3 | AK002671  | Human sapiens cDNA FL22976 f6, clone ZAT16027                                                              | 1.4 | down | biological process unknown      | 0.00259971  |
| 3 | AJ_142349 | Human sapiens full length insert cDNA clone YB44E02                                                        | 1.4 | down | biological process unknown      | 6.00315E-04 |
| 3 | AL390656  | Human sapiens mRNA full length insert cDNA clone EUROIMAGE 328974                                          | 1.3 | down | biological process unknown      | 0.00024825  |
| 3 | U28446    | Human mRNA for cyclotratin B, 5'UTR (sequence from the 5' cap to the start codon)                          | 1.8 | down | biological process unknown      | 0.004367359 |
| 3 | AK001713  | Human sapiens cDNA FL113111 f6, clone PLACE1010102                                                         | 1.4 | down | biological process unknown      | 0.00648993  |
| 3 | AL131113  | Human sapiens mRNA, cDNA DKF(Z)61M0121 from clone DKF(Z)61M0121                                            | 1.4 | down | biological process unknown      | 0.001127146 |
| 3 | AK023600  | Human sapiens cDNA FL13538 f6, clone PLACE1006617                                                          | 1.5 | down | biological process unknown      | 0.00889778  |
| 3 | AK026099  | Human sapiens cDNA FL122466 f6, clone HRC09457                                                             | 2.2 | down | biological process unknown      | 0.009163995 |
| 3 | NM_020348 | Human sapiens growth arrest-specific 1 (GAS1) mRNA                                                         | 1.7 | down | cell cycle arrest               | 0.00024029  |
| 3 | NM_019386 | Human sapiens candidate mediator of the 53-dependent G2 arrest (BEPFM2), mRNA                              | 1.3 | down | cell cycle arrest               | 0.000338642 |
| 3 | NM_006550 | Human sapiens Bcl2-interacting silencer binding protein (BSIP) mRNA                                        | 1.8 | down | developmental processes         | 0.008101064 |
| 3 | AL131703  | Human sapiens mRNA, cDNA DKF(Z)564P1772 from clone DKF(Z)564P1772                                          | 1.2 | down | DNA packaging                   | 0.00181628  |
| 3 | NM_001143 | Human sapiens tumoral hyaluronate (TH) mRNA                                                                | 1.8 | down | laminar metabolism              | 0.00004016  |
| 3 | NM_001413 | Human sapiens normal glutathione S-transferase 3 (GSTA3) mRNA, and translated products                     | 1.7 | down | oxidative metabolism            | 0.000141144 |
| 3 | NM_004837 | Human sapiens geranylgeranyl diphosphate synthase 1 (GGPS1), mRNA                                          | 1.4 | down | lipid metabolism                | 0.001170041 |
| 3 | NM_001305 | Human sapiens solute carrier family 25 (mitochondrial carrier, Anion), member 12 (SLC25A12) mRNA           | 1.8 | down | mitochondrial transport         | 4.5892E-09  |
| 3 | NM_014394 | Human sapiens hypothetical protein FL111342 (FL111342), mRNA                                               | 2   | down | nitrogen metabolism             | 0.002850132 |
| 3 | AL162605  | Human sapiens mRNA, cDNA DKF(Z)62K732 from clone DKF(Z)62K732                                              | 1.5 | down | transcription regulation        | 0.000966807 |
| 3 | L23544    | Human (clone Z1519) retinal mRNA                                                                           | 1.7 | down | biological process unknown      | 1.68971E-08 |
| 3 | AK024244  | Human sapiens cDNA FL114182 f6, clone NT28P0004675                                                         | 2.1 | up   | biological process unknown      | 1.01781E-07 |
| 3 | NM_018224 | Human sapiens hypothetical protein FL110803 (FL110803), mRNA                                               | 1.6 | up   | biological process unknown      | 6.826E-07   |
| 3 | AJ_086635 | Human sapiens full length insert cDNA clone ZEU0108                                                        | 1.7 | up   | biological process unknown      | 5.44637E-05 |
| 3 | AJ_142349 | Human sapiens full length insert cDNA clone YB00209                                                        | 1.1 | up   | biological process unknown      | 6.1082E-05  |
| 3 | AK026886  | Human sapiens cDNA FL122033 f6, clone HE088016, highly similar to H5U43374 human normal keratinocyte mRNA  | 1.6 | up   | biological process unknown      | 0.000105142 |
| 3 | AF028115  | Human sapiens clone Z368 mRNA sequence                                                                     | 1.3 | up   | biological process unknown      | 0.000390263 |
| 3 | AF049020  | Human sapiens clone H00352 PRC00352 mRNA, partial cds                                                      | 1.2 | up   | biological process unknown      | 0.001031299 |

|   |           |                                                                                                                                        |     |     |                                      |             |
|---|-----------|----------------------------------------------------------------------------------------------------------------------------------------|-----|-----|--------------------------------------|-------------|
| 3 | AF088035  | Human full length insert cDNA clone ZC26504                                                                                            | 1.5 | yes | biological process unknown           | 0.001835077 |
| 3 | AB024977  | Human sapiens cDNA FLJ1998 for UDP-Galactose 4-epimerase II (UGALACT4) (UGALACT4) complete cds                                         | 1.1 | no  | carbohydrate metabolism              | 2.40574E-06 |
| 3 | NM_005651 | Human sapiens lysophospholipase 9 (alpha) (L13) (lysophospholipase9) (L13) mRNA                                                        | 1.2 | no  | carbohydrate metabolism              | 0.002989979 |
| 3 | AB029396  | Human sapiens hu GCAT P mRNA for glucanuronyltransferase, complete cds                                                                 | 1.2 | yes | carbohydrate metabolism              | 0.005055305 |
| 3 | NM_006782 | Human sapiens zinc finger protein in MEN1 region (MGC4) mRNA                                                                           | 1.6 | yes | cell growth and maintenance          | 0.000808155 |
| 3 | NM_011283 | Human sapiens procollagen C1-endopeptidase enhancer 2 (PCCOLCE2) mRNA                                                                  | 1.5 | yes | cell growth and maintenance          | 0.001143091 |
| 3 | NM_014430 | Human sapiens cAMP binding protein (RBM4) mRNA                                                                                         | 1.7 | yes | cell growth and maintenance          | 0.001156682 |
| 3 | NM_001718 | Human sapiens bone morphogenetic protein 6 (BMP6) mRNA                                                                                 | 1.1 | yes | cell growth and maintenance          | 0.004081709 |
| 3 | DJ3487    | Human mRNA for KIAA0153 gene, partial cds                                                                                              | 1.2 | yes | cytoskeleton integrity               | 8E-15       |
| 3 | NM_017721 | Human sapiens hypothetical protein FLJ20541 (FLJ20541) mRNA                                                                            | 1.5 | yes | cytoskeleton integrity               | 2.11994E-05 |
| 3 | AK022060  | Human sapiens cDNA FLJ129987c, clone NT 129992023                                                                                      | 1.6 | no  | energy pathways                      | 0.000269399 |
| 3 | AL048679  | Human gene from PAC 79K10, chromosome X, similar to heparan sulphate 6-sulfotransferase                                                | 1.3 | yes | heparin sulfate biosynthesis         | 1.3547E-09  |
| 3 | NM_006332 | Human sapiens interferon, gamma-inducible protein 30 (IFI30) mRNA                                                                      | 1.7 | yes | immune response                      | 8.3858E-06  |
| 3 | NM_002416 | Human sapiens molecule induced by gamma interferon (MIG) mRNA                                                                          | 1.2 | yes | immune response                      | 0.00344768  |
| 3 | NM_001070 | Human sapiens UDP-glucosyltransferase 2 family, polypeptide B10 (UGT2B10) mRNA                                                         | 1.9 | no  | metabolism                           | 1.0130E-05  |
| 3 | AL137519  | Human sapiens mRNA, cDNA DKF Zp434A1518 (from clone DKF Zp434A1518), partial cds                                                       | 1.9 | yes | microtubule-based movement           | 0           |
| 3 | NM_004925 | Human sapiens splicing factor, arginine/serine-rich 5 (SF3F5) mRNA                                                                     | 1.4 | yes | mRNA processing                      | 4.88143E-05 |
| 3 | AF120908  | Human sapiens MAGE-D4 (MAGE-D4) mRNA, partial cds                                                                                      | 1.4 | yes | oncogenesis                          | 1.9466E-11  |
| 3 | L19178    | Human sapiens histone H2A.1b mRNA, complete cds                                                                                        | 1.8 | no  | peptide assembly                     | 8.0185E-06  |
| 3 | NM_002232 | Human sapiens potassium voltage-gated channel, shaker related subfamily, member 3 (KCNAB3) mRNA                                        | 1.5 | yes | potassium transport                  | 0.00010528  |
| 3 | AB037770  | Human sapiens mRNA for KIAA1349 protein, partial cds                                                                                   | 1.3 | yes | transcription regulation             | 3.68379E-05 |
| 3 | NM_017912 | Human sapiens hypothetical protein FLJ20637 (FLJ20637) mRNA                                                                            | 1.4 | yes | ubiquitination                       | 4.50627E-06 |
| 4 | 004945    | HUMAN OMBP1, THE 1ST OF FOUR 100% IDENTICAL CONSERVED REPEATS                                                                          | 1.4 | yes | biological process unknown           | 2.42274E-06 |
| 4 | L07383    | Human sapiens E2 small nuclear RNA                                                                                                     | 1.8 | no  | biological process unknown           | 0.00020539  |
| 4 | AK017722  | Human sapiens cDNA FLJ11660 fs, clone HELM0100410                                                                                      | 1.5 | no  | biological process unknown           | 0.00033026  |
| 4 | AK022224  | Human sapiens cDNA FLJ1162 fs, clone NT 2893002625                                                                                     | 1.4 | no  | biological process unknown           | 0.00050031  |
| 4 | AF108644  | Human sapiens full length insert cDNA clone Y24021                                                                                     | 1.3 | no  | biological process unknown           | 0.000107029 |
| 4 | AK021125  | Human sapiens cDNA FLJ10263 fs, clone HELM0100991                                                                                      | 1.3 | no  | biological process unknown           | 0.00420517  |
| 4 | L19249    | Human clone ZB29 mRNA sequence                                                                                                         | 2.2 | no  | biological process unknown           | 0.00452961  |
| 4 | AK000145  | Human sapiens cDNA FLJ20158 fs, clone COL08935                                                                                         | 1.2 | no  | biological process unknown           | 0.001709425 |
| 4 | NM_001133 | Human sapiens home oxygenase (hepoxalygin) 1 (HMOX1) mRNA                                                                              | 2.8 | no  | CYP steroid hormone biosynthesis     | 1.74019E-07 |
| 4 | L082170   | Human EST clone Z61000 mature transcription factor sequences                                                                           | 1.5 | no  | complex binding                      | 0.00139618  |
| 4 | NM_002563 | Human sapiens purinergic receptor P2Y, G-protein coupled, 1 (P2RY1) mRNA                                                               | 1.2 | no  | G-protein signaling, activates PLC   | 0.001918707 |
| 4 | NM_014664 | Human sapiens KIAA0615 gene product (KIAA0615) mRNA                                                                                    | 1.6 | no  | proteolysis and peptidolysis         | 0.0017226   |
| 4 | L02077    | Human clone 199288 de novo marker transposon Hmar2 mRNA sequence                                                                       | 1.4 | no  | biological process unknown           | 9.44859E-07 |
| 4 | L19443    | Human clone Z556 mRNA sequence                                                                                                         | 1.7 | no  | biological process unknown           | 0.000172738 |
| 4 | NM_012200 | Human sapiens beta-1,3-galactosyltransferase 3 (galactosyltransferase 3) (B3GAT3) mRNA                                                 | 1.5 | yes | carbohydrate metabolism              | 0.000264031 |
| 4 | NM_016709 | Human sapiens PPAR(gamma) angiprotein related protein (PPAR), mRNA                                                                     | 1.3 | yes | cell growth and maintenance          | 1.86277E-08 |
| 4 | AL131724  | Human sapiens mRNA, cDNA DKF Zp434D1319 (from clone DKF Zp434D1319), partial cds                                                       | 1.3 | yes | cell growth and maintenance          | 0.000100435 |
| 4 | NM_011737 | Human sapiens hypothetical protein FLJ20275 (FLJ20275) mRNA                                                                            | 1.6 | yes | cell growth and maintenance          | 0.000120203 |
| 4 | AK024607  | Human sapiens cDNA FLJ14005 fs, clone YFMA1002361, moderately similar to Rattus norvegicus mRNA for protein phosphatase 1 (GL-subunit) | 1.7 | yes | glycogen metabolism                  | 2.59537E-10 |
| 4 | AF191033  | Human sapiens cAMP binding protein RAB17B (RAB17B) mRNA, partial cds                                                                   | 1.8 | yes | intracellular protein traffic        | 0.00138839  |
| 4 | NM_002871 | Human sapiens RAB interacting factor (RABIF) mRNA                                                                                      | 1.5 | yes | ion selective vesicle transport      | 0.000179949 |
| 4 | NM_006765 | Human sapiens Rabin protein cancer tumor suppressor protein (R31), mRNA                                                                | 1.1 | yes | protein nuclear import               | 1.01894E-06 |
| 4 | NM_004113 | Human sapiens fibroblast growth factor 126 (FGF126) mRNA                                                                               | 1.6 | yes | signal transduction                  | 0.00434052  |
| 5 | NM_000079 | Human sapiens glutamic oxaloacetic transaminase 1, soluble (aspartate aminotransferase 1) (GOT1) mRNA                                  | 1.7 | yes | inorganic catabolism                 | 0.000172809 |
| 5 | AF120831  | Human sapiens quantum nucleolar exchanger factor (QRNCE) 4b mRNA, 5' UTR and partial cds                                               | 2.1 | no  | biological process unknown           | 1.18110E-09 |
| 5 | NM_016633 | Human sapiens hypothetical protein PR02106 (PR02106) mRNA                                                                              | 1.8 | no  | biological process unknown           | 0.00555E-07 |
| 5 | AF105022  | Human sapiens full length insert cDNA clone ZC26610                                                                                    | 1.5 | no  | biological process unknown           | 0.01105E-05 |
| 5 | M11948    | Human promyelocytic leukemia cell mRNA, clones pHE5 and pHE1                                                                           | 1.6 | no  | biological process unknown           | 0.00024091  |
| 5 | L00962    | Human clone MAB2817 (CA3) (E13) repeat-containing mRNA                                                                                 | 1.7 | no  | biological process unknown           | 0.00089186  |
| 5 | L19225    | Human sapiens mRNA for fractalin, 5' untranslated, alternative 5' UTR                                                                  | 1.4 | no  | biological process unknown           | 0.00108915  |
| 5 | AK020728  | Human sapiens cDNA FLJ10075 fs, clone LINC57192                                                                                        | 1.6 | no  | biological process unknown           | 0.001148951 |
| 5 | AF147395  | Human sapiens full length insert cDNA clone Y162-12                                                                                    | 1.5 | no  | biological process unknown           | 0.001881459 |
| 5 | X03168    | Human mRNA for 5-protein                                                                                                               | 1.9 | no  | cell adhesion                        | 0.001129344 |
| 5 | AF104352  | Human sapiens tyrosine ligase B mRNA, partial cds                                                                                      | 1.3 | no  | cell cycle                           | 0.00224214  |
| 5 | NM_002492 | Human sapiens NADH dehydrogenase (ubiquinone) 1 beta subcomplex, 5 (114d), (SCQR) (NDUF8) mRNA, and translated products                | 1.9 | no  | complex (NADH to ubiquinone)         | 2.9910E-08  |
| 5 | NM_002493 | Human sapiens NADH dehydrogenase (ubiquinone) 1 beta subcomplex, 4 (174d, B1) (NDUF8) mRNA, and translated products                    | 1.4 | no  | complex 1 (NADH to ubiquinone)       | 0.00039787  |
| 5 | NM_005006 | Human sapiens NADH dehydrogenase (ubiquinone) Fe-S protein 1 (754d) (NADH-coenzyme Q reductase) (NDUF51) mRNA                          | 2.4 | no  | complex 1 (NADH to ubiquinone)       | 0.001563059 |
| 5 | NM_007079 | Human sapiens protein tyrosine phosphatase type IVA, member 3 (PTP4A3) mRNA                                                            | 1.7 | no  | DNA replication                      | 1.1532E-05  |
| 5 | NM_002000 | Human sapiens succinate dehydrogenase complex, subunit B, non-vault (SDHB), nuclear gene encoding mitochondrial protein, mRNA          | 2.4 | no  | electron transport                   | 0.000191835 |
| 5 | AL137511  | Human sapiens mRNA, cDNA DKF Zp47610222 (from clone DKF Zp47610222)                                                                    | 1.3 | no  | electron transport                   | 0.001218442 |
| 5 | NM_007103 | Human sapiens NADH dehydrogenase (ubiquinone) flavoprotein 1 (F1) (NDUFV1) mRNA                                                        | 1.9 | no  | energy pathways                      | 0.000114478 |
| 5 | NM_000016 | Human sapiens acyl Coenzyme A dehydrogenase, C-4 to C-12 straight chain (ACADM), nuclear gene encoding mitochondrial product, mRNA     | 2.3 | no  | fatty acid beta-oxidation            | 0.0014041   |
| 5 | NM_001359 | Human sapiens 2,4-dihydroxy CoA reductase 1, mitochondrial (DCR1), mRNA                                                                | 1.8 | no  | fatty acid beta-oxidation            | 0.00197959  |
| 5 | NM_001995 | Human sapiens fatty acid Coenzyme A ligase, long-chain 1 (FACL1), nuclear gene encoding mitochondrial protein, mRNA                    | 2.2 | no  | fatty acid metabolism                | 8E-15       |
| 5 | NM_000925 | Human sapiens pyruvate dehydrogenase (lipoylase) beta (PDHB) mRNA                                                                      | 1.7 | no  | glucose metabolism                   | 0.000125179 |
| 5 | NM_002103 | Human sapiens glycogen synthase 1 (muscle) (GYS1) mRNA                                                                                 | 1.7 | no  | glycogen metabolism                  | 0.00081999  |
| 5 | AL131831  | Human sapiens mRNA, cDNA DKF Zp434B619 (from clone DKF Zp434B619), partial cds                                                         | 1.6 | no  | intracellular protein traffic        | 0.00958048  |
| 5 | NM_018444 | Human sapiens uncharacterized hemopoietic stem/progenitor cells protein MDS209 (MDS209) mRNA                                           | 1.9 | no  | microtubule-based process            | 3.0763E-08  |
| 5 | AL050182  | Human sapiens mRNA, cDNA DKF Zp58A1923 (from clone DKF Zp58A1923)                                                                      | 1.9 | no  | microtubule-based process            | 0.004033682 |
| 5 | NM_002218 | Human sapiens inter alpha (globulin) inhibitor H4 (plasma kallistatin sensitive glycoprotein) (IH4) mRNA                               | 1.2 | no  | proteolysis and peptidolysis         | 0.00358615  |
| 5 | S16438    | Helicobacter naster fibronectin-binding complex 4, Helmer, mRNA, 2802 nt                                                               | 2.2 | no  | DNA processing                       | 2.40E-12    |
| 5 | NM_002756 | Human sapiens mitogen-activated protein kinase kinase 1 (MAP2KK1) mRNA                                                                 | 2   | no  | signal transduction                  | 5.71804E-08 |
| 5 | L064725   | Human heat shock protein mRNA, complete cds                                                                                            | 1.4 | no  | spermatid development                | 0.000542513 |
| 5 | NM_007232 | Human sapiens calcyriopodin 2, cardiac muscle (CACSD2) mRNA                                                                            | 1.8 | no  | striated muscle contraction          | 2.17972E-10 |
| 5 | NM_015817 | Human sapiens acylglucuronidyltransferase (1) (UGAT1) (UGAT1) (AC1), transcript variant 4 (L1), mRNA                                   | 1.9 | no  | synaptic transmission                | 1.23311E-07 |
| 5 | NM_001754 | Human sapiens nucleic acid phosphorylase, translation initiation factor 1, subunit 5 (open), (NED) (EIF3S5) mRNA                       | 1.8 | no  | translational regulation, initiation | 0.004731168 |
| 5 | NM_006759 | Human sapiens UDP-glucose pyrophosphorylase 2 (UGPP2) mRNA                                                                             | 2   | no  | UDP-glucose metabolism               | 1.0308E-07  |
| 5 | AK022282  | Human sapiens cDNA FLJ12220 fs, clone MAMMA1001060                                                                                     | 1.9 | yes | biological process unknown           | 1.02208E-08 |
| 5 | L017072   | Human tandem repeat region from histone H4/ubiquitin nuclear dyotrophy-associated mRNA clone: UNH4ubeta                                | 1.3 | yes | biological process unknown           | 1.35123E-06 |
| 5 | NM_001492 | Human sapiens TRAI1 gene (TRAI1) mRNA                                                                                                  | 1.8 | no  | biological process unknown           | 0.001131111 |
| 5 | D16875    | Human Hspic3 3' region cDNA, clone hend1106                                                                                            | 1.4 | yes | biological process unknown           | 0.000195273 |
| 5 | L02812    | Human sapiens G1-du-chal region mRNA, clone CSC3                                                                                       | 1.6 | yes | biological process unknown           | 0.00085626  |
| 5 | AJ001804  | Human sapiens DNA selection product, DCR1 24.0                                                                                         | 1.2 | yes | biological process unknown           | 0.001139771 |
| 5 | AK022096  | Human sapiens cDNA FLJ1208 fs, clone HELM0100850                                                                                       | 1.4 | no  | biological process unknown           | 0.001103195 |
| 5 | AK022343  | Human sapiens cDNA FLJ12281 fs, clone MAMMA1001145                                                                                     | 1.4 | yes | biological process unknown           | 0.002352396 |
| 5 | AK024832  | Human sapiens cDNA FLJ20879 fs, clone AKM01314                                                                                         | 1.1 | yes | biological process unknown           | 0.001801208 |
| 5 | NM_000496 | Human sapiens gene predicted from cDNA with a complete coding sequence (KIAA0105) mRNA                                                 | 1.8 | yes | cell cycle                           | 7.90626E-08 |
| 5 | NM_001793 | Human sapiens GLO2 protein (GLO2) mRNA                                                                                                 | 1.9 | no  | cytoskeleton integrity               | 2.2053E-05  |
| 5 | NM_002162 | Human sapiens hypothetical protein DKF Zp762f2011 (DKF Zp762f2011) mRNA                                                                | 2.1 | yes | developmental processes              | 6.8326E-07  |
| 5 | NM_004506 | Human sapiens D-phosphofructo-2-kinase/fructose-2,6-diphosphatase 3 (PFKFB3) mRNA                                                      | 3.3 | yes | fructose metabolism                  | 2E-14       |
| 5 | NM_002412 | Human sapiens pyruvate dehydrogenase kinase, isoenzyme 4 (PKD4) mRNA                                                                   | 1.7 | yes | glucose metabolism                   | 0.000177176 |
| 5 | NM_000796 | Human sapiens insulin like growth factor binding protein 1 (IGFBP1) mRNA                                                               | 1.9 | yes | growth factor production             | 2.133E-11   |
| 5 | NM_005900 | Human sapiens MAZ5, son transcription enhancer factor 2, polypeptide 0 (myocyte enhancer factor 20) (MEF20) mRNA                       | 1.4 | yes | transcription regulation             | 0.009643229 |
| 5 | NM_001647 | Human sapiens apolipoprotein D (APOD) mRNA                                                                                             | 1.7 | yes | transport                            | 0.002302229 |
